# Supplementary material for: Constructing a Reward-Related Quality of Life Statistic in Daily Life—a Proof of Concept Study Using Positive Affect
Source: PubMed Central journal article supplement (PMC5673660; doi:10.3389/fpsyg.2017.01917), 2017-11-02
Supplement: Presentation1.pdf [file Presentation1.pdf]

*Supplementary Material*

**Constructing a Reward-Related Quality of Life Statistic in Daily  
Life**

**– a Proof of Concept Study Using Positive Affect-**

**Simone J. W. Verhagen<sup>1\*</sup>, Claudia J. P. Simons<sup>1,2</sup>, Catherine van Zelst<sup>1</sup>, Philippe A. E.  
G. Delespaul<sup>1,3</sup>**

**\* Correspondence:** Simone Verhagen: [simone.verhagen@maastrichtuniversity.nl](mailto:simone.verhagen@maastrichtuniversity.nl)

### List of abbreviations

---

|          |                                                                                                    |
|----------|----------------------------------------------------------------------------------------------------|
| ESM      | Experience Sampling Method (or EMA: Ecological Momentary Assessment)                               |
| rQoL     | reward-related Quality of Life                                                                     |
| mQoL     | momentary Quality of Life                                                                          |
| MCs      | Monte Carlo simulations                                                                            |
| BS       | Behavior Setting (context or situation)                                                            |
| BS_W     | BS: What = situation defined by current activity                                                   |
| BS_WW    | BS: What Who = situation defined by combining current activity and persons present                 |
| BS_WWW   | BS: What Who Where = situation defined by combining current activity, persons present and location |
| PA       | Positive Affect                                                                                    |
| NA       | Negative Affect                                                                                    |
| <i>N</i> | Number of observations or so-called beeps                                                          |

---

### **Clinical implications rQoL statistic –hypothetical case example-**

Patient X has used ESM for several weeks to monitor her progress towards recovery. She struggles with her daily routine and does not feel satisfied with the way her life is going at the moment. However, she does not really know what to change in her life to feel satisfied again. Together with her clinician, ESM data are discussed using an online reporting page that explores the subject's mental state and context using interactive graphs and figures. The reporting page is intended as a tool for collaboration and can be used to generate functional analyses. For each beep moment, a rQoL score is presented on the screen, ranging from negative to positive, with 0 as a neutral point. A positive score represents feeling good in a situation that also occurs frequently (plus-plus) or feeling less good in a situation that is infrequent (minus-minus). Negative scores reflect an imbalance in daily life reward experiences (feeling good in infrequent (plus-minus) or bad in frequent situations (minus-plus)). Series of rQoL scores are displayed over time, to identify time trends and outliers. At each time point, the rQoL score can be explored to zoom into the behavior setting of that moment. The exploration assesses both strengths and weaknesses of the individual. Together with the clinician, patient X decides on action points that could lead to small changes in daily life that are deemed realistic. Continued monitoring provides the necessary feedback to see if progress can be made towards improved reward-efficiency and ultimate to well-being.

## STATA™ (v13.0) do file for Monte Carlo experiments

```
*ssc install egenmore

clear all

program define mc_reward, rclass
file open Total_OK using "C:\...\result_file_of simulations.csv", write replace

* writing header

    file write Total_OK "Iteration"
    file write Total_OK _tab
    file write Total_OK "cnt catheg"
    file write Total_OK _tab
    file write Total_OK "Mean rPA"
    file write Total_OK _tab
    file write Total_OK "sd rPA"
    file write Total_OK _tab
    file write Total_OK "min rPA"
    file write Total_OK _tab
    file write Total_OK "max rPA"
    file write Total_OK _tab
    file write Total_OK "corr PArPA"
    file write Total_OK _n

set more off

* iterations

forvalues xi=1(1)1000 {
    clear
    use "C:\...\reward_datafile_of_ESM_seeds.dta"
    bsample 100
    egen cnt_bs=nvals(behav_setting)
    egen mPA=mean(sub_pa)
    egen sdPA=sd(sub_pa)
    gen zPA=(sub_pa-mPA)/sdPA
    so behav_setting
    by behav_setting:egen cfreq=count(behav_setting)
    so cfreq behav_setting
    egen crfreq=rank(cfreq)
    generate crprop=cfreq/_N
    gen rPA=zPA*(crprop-.50)
    summarize cnt_bs
    file write Total_OK "Iteration"
    file write Total_OK (`xi')
```

```

file write Total_OK _tab
file write Total_OK (string(r(mean)))
summarize rPA
file write Total_OK _tab
file write Total_OK (string(r(mean)))
file write Total_OK _tab
file write Total_OK (string(r(sd)))
file write Total_OK _tab
file write Total_OK (string(r(min)))
file write Total_OK _tab
file write Total_OK (string(r(max)))
correlate sub_pa rPA
file write Total_OK _tab
file write Total_OK (string(r(rho)))
file write Total_OK _n
}

file close Total_OK
clear
import delimited "C:\...\result_file_of simulations.csv"
su
histogram cnt catheg
histogram mean rpa

```

# Overview Monte Carlo experiments

**Seed dataset**  
Twenty-three subjects  
A total of 1058 unique observations

**Virtual data**  
Using pooled subject data

**Real data**  
Using individual subject data

Which  $N$  is needed to reliably assess BS in individuals?

Which  $N$  is needed for optimal variation in reward?

Is rQoL distinct from PA?

What is the effect of actual contextual variation?

one low variation subject

one average variation subject

one high variation subject

BS\_WWW

BS\_WW

BS\_W

BS\_WWW

BS\_WW

BS\_W

$N$  (1000 iterations)  
20 80 500 2000 8000  
40 100 750 3000 10000  
60 250 1000 4000

$N$  (1000 iterations)  
20 80 500 2000 8000  
40 100 750 3000 10000  
60 250 1000 4000

$N$  (1000 iterations)  
20 40 60 80 100

$N$  (1000 iterations)  
20 40 60 80 100

BS\_WWW
